# Supplementary material for: Transparent, stretchable, carbon-nanotube-inlaid conductors enabled by standard replication technology for capacitive pressure, strain and touch sensors
Source: Royal Society of Chemistry journal article supplement (doi:10.1039/c3ta00079f), 2013-01-01
Supplement: c3ta00079f.pdf [file c3ta00079f.pdf]

Supporting Information

## Transparent, stretchable, carbon-nanotube-inlaid conductors enabled by standard replication technology for capacitive pressure, strain and touch sensors

Xiaolong Wang,<sup>a,b</sup> Tingjie Li,<sup>a</sup> Jillian Adams<sup>c</sup> and Jun Yang<sup>\*a</sup>

<sup>a</sup> Department of Mechanical and Materials Engineering, the University of Western Ontario, London, Ontario, N6A 5B9, Canada. E-mail: jyang@eng.uwo.ca

<sup>b</sup> State Key Laboratory of Solid Lubrication, Lanzhou Institute of Chemical Physics, Chinese Academy of Sciences, Lanzhou 730000, P. R. China.

<sup>c</sup> Department of Mechanical and Mechatronics Engineering, University of Waterloo, Waterloo, Ontario, N2L 3G1, Canada.

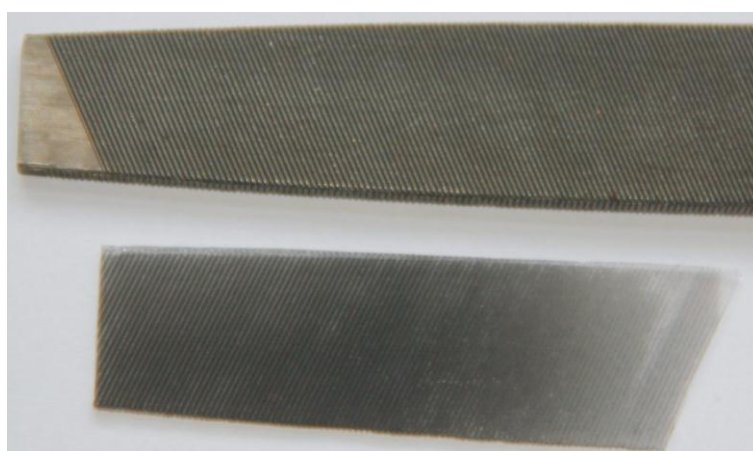

Fig. S1 Digital images of rasp (top) and the SWCNTs/PDMS obtained using rasp as substrate (bottom).

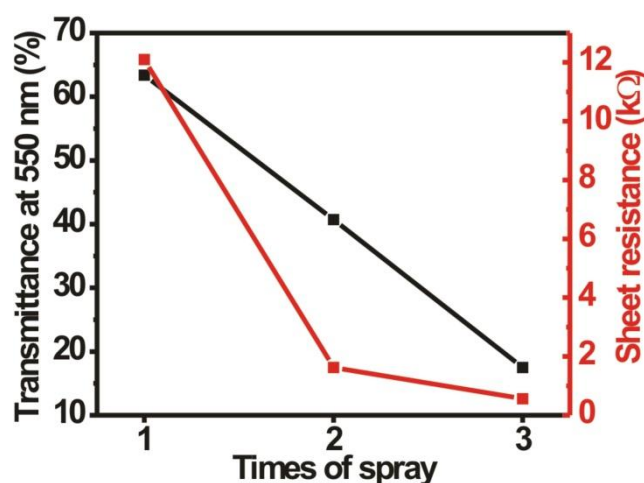

Fig. S2 Transmittance and sheet resistance of the SWCNTs/PDMS obtained by spray coating different amounts of suspension (1 time spray means spraying 20 mL of SWCNTs suspension).

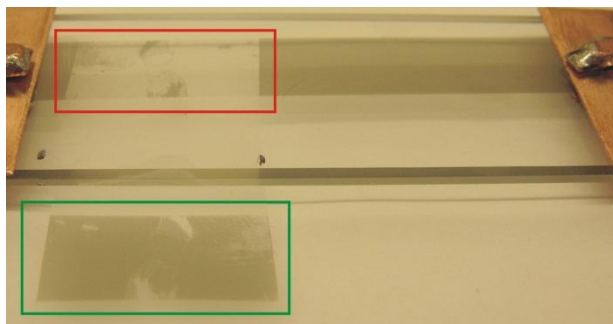

**Fig. S3** Digital images of SWCNTs film coated PDMS after 1 tape test. The area in the red rectangle is the tape test area, and the green is the SWCNTs peeled off on the tape surface.

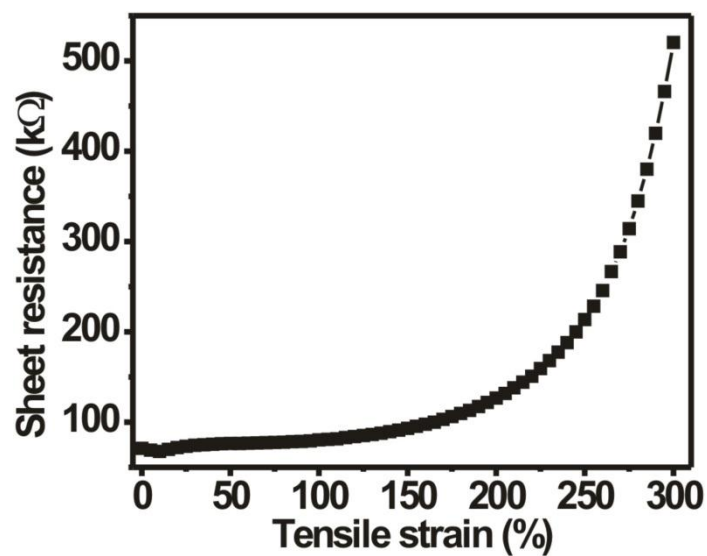

**Figure S4.** Resistance of SWCNTs/Ecoflex as function of tensile strain to 300%.

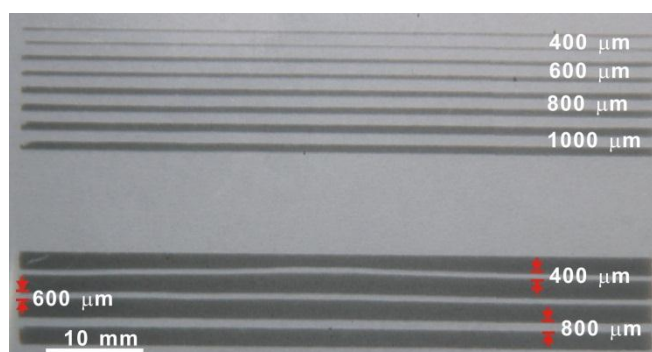

**Fig. S5** Digital image of patterned SWCNTs line inlaid PDMS. (Top) patterned lines with width of 0.4 mm, 0.6 mm, and 0.8 mm (spacing between line 1 mm). (Bottom) 2 mm of width SWCNTs lines with 0.8 mm, 0.6 mm, and 0.4 mm of spacing between lines, respectively.

**Movie S1** Stretchability demonstration of SWCNTs/PDMS integrated circuit with LED under tensile strain 0% to 50%.

**Movie S2** Flexibility demonstration of SWCNTs/PDMS integrated circuit with LED under bending and twisting.

**Movie S3** Mechanical stability demonstration of SWCNTs/PDMS integrated circuit with LED under finger erasing.
